# Supplementary material
Source: MDPI journal article supplement (https://www.mdpi.com/2227-9717/9/8/1430)
Supplement: s1 [file s1 › processes-1314495-supplementary.pdf]

## Supplementary Data

**Table S1:** Contribution of media and water for injection (WFI) to the cost of raw materials.

|              | <b>B1</b> | <b>B2</b> | <b>P1</b> | <b>P2</b> |
|--------------|-----------|-----------|-----------|-----------|
| Media Powder | 89%       | 84%       | 97%       | 95%       |
| WFI          | 6%        | 9%        | 1%        | 1%        |
| Media + WFI  | 95%       | 93%       | 98%       | 96%       |

**Table S2:** Retail prices of media used for cell growth and viral production by HEK 293 and retinoblast cells.

| <b>Supplier</b>       | <b>Medium</b>                                  | <b>Volume (L)</b> | <b>Price* (\$)</b> | <b>Cost (\$/L)</b> |
|-----------------------|------------------------------------------------|-------------------|--------------------|--------------------|
| ThermoFisher          | Adenovirus Expression Medium, for PER.C6 cells | 1                 | 111.00             | 111                |
|                       | 293 SFM** II                                   | 1                 | 127.00             | 127                |
|                       | CD 293 Medium                                  | 1                 | 119.00             | 119                |
| Sigma-Aldrich (Merck) | EX-CELL 293 SFM** for HEK 293 Cells            | 1                 | 88.00              | 88                 |
|                       |                                                | 5                 | 473.00             | 95                 |
|                       |                                                | 10                | 814.00             | 81                 |
|                       | EX-CELL VPRO SFM** for Retinoblast Cells       | 50                | 2810.00            | 56                 |
|                       |                                                | 1                 | 89.70              | 90                 |
|                       |                                                | 10                | 819.00             | 82                 |
|                       |                                                | 50                | 2750.00            | 55                 |
| Cytiva Life Sciences  | HyClone CDM4Retino cell culture media          | 5                 | 280.00             | 56                 |

\*Prices obtained from [1–3]

\*\* SFM: Serum-Free Medium

### References:

- [1] Thermo Fisher Scientific. Thermo Fisher Scientific (United States) n.d. <https://www.thermofisher.com/us/en/home/order/> (accessed July 1, 2021).
- [2] Sigma-Aldrich. Sigma-Aldrich (United States) n.d. <https://www.sigmaaldrich.com/US/en/> (accessed July 1, 2021).
- [3] Cytiva Life Sciences. Cytiva Life Sciences (United States) n.d. <https://www.cytivalifesciences.com/en/us/shop> (accessed May 13, 2021).
